# Supplementary material
Source: PubMed Central journal article supplement (PMC5649363)
Supplement: NIHMS885187-supplement-1.pdf [file NIHMS885187-supplement-1.pdf]

| <b>Supplemental table 1. Characteristics of studies included in the analysis: Ovarian Cancer Association Consortium<sup>1</sup>.</b> |                                                                            |                                          |                                 |                                                  |                                                            |                                                            |                                  |                           |                                  |                           |                           |                             |
|--------------------------------------------------------------------------------------------------------------------------------------|----------------------------------------------------------------------------|------------------------------------------|---------------------------------|--------------------------------------------------|------------------------------------------------------------|------------------------------------------------------------|----------------------------------|---------------------------|----------------------------------|---------------------------|---------------------------|-----------------------------|
| <b>Study acronym</b>                                                                                                                 | <b>Study name</b>                                                          | <b>Study location, year of diagnosis</b> | <b>Data collection method</b>   | <b>Endometriosis</b>                             | <b>Asthma</b>                                              | <b>Auto immune</b>                                         | <b>Depression</b>                | <b>Osteoporosis</b>       | <b>Gallbladder disease</b>       | <b>Kidney disease</b>     | <b>Liver disease</b>      | <b>Neurological disease</b> |
| AOV                                                                                                                                  | Alberta Ovarian Tumor Types Study                                          | Canada 1978-2010                         | MRR                             | MRR: reporting of disease                        | -                                                          | -                                                          | -                                | -                         | -                                | -                         | -                         | -                           |
| AUS <sup>2</sup>                                                                                                                     | Australian Ovarian Cancer Study                                            | Australia 2002-2006                      | Self-completed questionnaire    | Q:Ever having disease                            | Q:Ever having disease                                      | Q:Ever having disease                                      | Q:Ever having disease            | Q:Ever having disease     | Q:Ever having disease            | Q:Ever having disease     | Q:Ever having disease     | Q:Ever having disease       |
| BAV <sup>2</sup>                                                                                                                     | Bavarian Ovarian Cancer Cases and Controls                                 | Germany 2002-2006                        | In-person interview             | Q: disease found during surgery                  | -                                                          | -                                                          | -                                | -                         | -                                | -                         | -                         | -                           |
| CON                                                                                                                                  | Connecticut Ovarian Cancer Study                                           | USA: CT 1998-2003                        | In-person interview             | Q:Disease diagnosed by physician                 | -                                                          | -                                                          | -                                | -                         | -                                | -                         | -                         | -                           |
| DOV                                                                                                                                  | Disease of the Ovary and their Evaluation Study                            | USA: WA 2002-2005 (DOV) 2006-2009 (DVE)  | In-person interview             | Q:Disease diagnosed by physician                 | -                                                          | Q:Disease diagnosed by physician                           | -                                | -                         | -                                | -                         | -                         | -                           |
| GER                                                                                                                                  | German Ovarian Cancer Study                                                | Germany 1993-1996                        | Self-administered questionnaire | Q:Disease diagnosed by physician                 | -                                                          | -                                                          | -                                | -                         | Q:Disease diagnosed by physician | -                         | -                         | -                           |
| HAW <sup>2</sup>                                                                                                                     | Hawaii Ovarian Cancer Study                                                | USA: HI 1993-2008                        | In-person interview             | Q:Disease diagnosed by physician                 | -                                                          | Q:Disease diagnosed by physician                           | Q:Disease diagnosed by physician | -                         | -                                | -                         | -                         | -                           |
| HJO <sup>2</sup>                                                                                                                     | Hannover-Jena Ovarian Cancer Study                                         | Germany 2007-2011                        | MRR                             | MRR: reporting of disease                        |                                                            | MRR: reporting of disease                                  |                                  |                           | MRR: reporting of disease        |                           |                           |                             |
| HOP <sup>2</sup>                                                                                                                     | Hormones and Ovarian Cancer Prediction Study                               | USA: PA, OH, and NY 2003-2009            | In-person interview, MRR        | Q:Ever having disease; MRR: reporting of disease | Q:Disease diagnosed by physician MRR: reporting of disease | Q:Disease diagnosed by physician MRR: reporting of disease | MRR: reporting of disease        | MRR: reporting of disease | MRR: reporting of disease        | MRR: reporting of disease | MRR: reporting of disease | MRR: reporting of disease   |
| JPN <sup>2</sup>                                                                                                                     | Hospital-based Research Program at Aichi Cancer Center                     | Japan 2001-2005                          | In-person interview             | Q:Ever having disease                            | Q:Ever having disease                                      | Q:Ever having disease                                      | Q:Ever having disease            | Q:Ever having disease     | Q:Ever having disease            | Q:Ever having disease     | Q:Ever having disease     | Q:Ever having disease       |
| LAX <sup>2</sup>                                                                                                                     | Women's Cancer Program at the Samuel Oschin Comprehensive Cancer Institute | USA: CA 1989-present                     | MRR                             | MRR: reporting of disease                        | -                                                          | MRR: reporting of disease                                  | -                                | -                         | MRR: reporting of disease        | -                         | -                         | -                           |

|                  |                                                                             |                                          |                                   |                                                               |                                                               |                                   |                                         |                                                               |                                  |                                                               |                                                               |                                                               |
|------------------|-----------------------------------------------------------------------------|------------------------------------------|-----------------------------------|---------------------------------------------------------------|---------------------------------------------------------------|-----------------------------------|-----------------------------------------|---------------------------------------------------------------|----------------------------------|---------------------------------------------------------------|---------------------------------------------------------------|---------------------------------------------------------------|
| MAC <sup>2</sup> | Mayo Clinic Case-Only Ovarian Cancer Study                                  | USA<br>2000-2011                         | Self-completed questionnaire      | Q:Ever diagnosed with disease                                 | -                                                             | -                                 | -                                       | -                                                             | -                                | -                                                             | -                                                             | -                                                             |
| MAL <sup>2</sup> | <u>MAL</u> ignnant <u>OV</u> arian cancer                                   | Denmark<br>1994-1999                     | In-person interview               | Q:Disease diagnosed by physician                              | Q:Determined based on medication intake                       | Q:Disease diagnosed by physician  | Q:Determined based on medication intake | Q:Disease diagnosed by physician                              | -                                | -                                                             | Q:Disease diagnosed by physician                              | -                                                             |
| MAY <sup>2</sup> | Mayo Clinic Ovarian Cancer Case-Control Study                               | USA: MN, SD, ND, IL, IA, WI<br>2003-2009 | In-person interview               | Q:Ever diagnosed with disease                                 | -                                                             | -                                 | -                                       | -                                                             | -                                | -                                                             | -                                                             | -                                                             |
| NCO <sup>2</sup> | North Carolina Ovarian Cancer Study                                         | USA: NC                                  | Self-completed questionnaire      | Q:Disease diagnosed by physician                              | -                                                             | Q:Disease diagnosed by physician  | Q:Disease diagnosed by physician        | Q:Disease diagnosed by physician                              | Q:Disease diagnosed by physician | -                                                             | -                                                             | -                                                             |
| NEC <sup>2</sup> | New England Case-Control Study of Ovarian Cancer                            | USA:NH and MA<br>1992-2003               | In-person interview               | Q:Ever having disease                                         | Q:Ever having disease                                         | Q:Ever having disease             | Q:Ever having disease                   | Q:Ever having disease                                         | Q:Ever having disease            | Q:Ever having disease                                         | Q:Ever having disease                                         | Q:Ever having disease                                         |
| NJO              | New Jersey Ovarian Cancer Study                                             | USA: NJ<br>2002-2008                     | Phone interview                   | Q:Disease diagnosed by physician                              | -                                                             | Q:Disease diagnosed by physician  | Q:Disease diagnosed by physician        | Q:Disease diagnosed by physician                              | -                                | -                                                             | -                                                             | Q:Disease diagnosed by physician                              |
| NTH              | Nijmegen Ovarian Cancer Study                                               | Netherlands<br>1989-2006                 | Self-completed questionnaires MRR | Q:Disease diagnosed by physician<br>MRR: reporting of disease | Q:Disease diagnosed by physician<br>MRR: reporting of disease | Q: Disease diagnosed by physician | -                                       | Q:Disease diagnosed by physician<br>MRR: reporting of disease | -                                | Q:Disease diagnosed by physician<br>MRR: reporting of disease | Q:Disease diagnosed by physician<br>MRR: reporting of disease | Q:Disease diagnosed by physician<br>MRR: reporting of disease |
| TBO              | Tampa Bay Ovarian Cancer Study                                              | USA:FL<br>2000-present                   | Self-completed questionnaires     | Q:Disease diagnosed by physician                              | -                                                             | -                                 | -                                       | -                                                             | -                                | -                                                             | -                                                             | -                                                             |
| UCI              | University of California, Irvine Ovarian Cancer Study                       | USA: CA<br>1995-2005                     | Self-completed questionnaires     | Q:Disease diagnosed by physician                              | -                                                             | -                                 | -                                       | -                                                             | -                                | -                                                             | -                                                             | -                                                             |
| UKO              | United Kingdom Ovarian Cancer Population Study                              | United Kingdom<br>2006-2010              | Self-completed questionnaires     | Q:Disease diagnosed by physician                              | -                                                             | -                                 | -                                       | -                                                             | -                                | -                                                             | -                                                             | -                                                             |
| USC              | University of Southern California, Study of Lifestyle and Women's Health OR | USA: CA<br>1993-2005                     | In-person interview               | Q:Diagnosed by physician                                      | -                                                             | -                                 | -                                       | -                                                             | -                                | -                                                             | -                                                             | -                                                             |

|     |                                                           |        |                                 |   |                     |                     |                     |                     |                     |                     |                     |                     |
|-----|-----------------------------------------------------------|--------|---------------------------------|---|---------------------|---------------------|---------------------|---------------------|---------------------|---------------------|---------------------|---------------------|
|     | Los Angeles County Case-Control Studies of Ovarian Cancer |        |                                 |   |                     |                     |                     |                     |                     |                     |                     |                     |
| WOC | Warsaw Ovarian Cancer Study                               | Poland | Self-administered questionnaire | - | Ever having disease |

**<sup>1</sup>AOV:** Kelemen LE, Köbel M, Chan A, Taghaddos S, Dinu I. Differentially methylated loci distinguish ovarian carcinoma histological types: Evaluation of a DNA methylation assay in FFPE tissue. *Biomed Res Int Pathol* 2013;2013:815894.

**AUS:** Merritt MA, Green AC, Nagle CM, Webb PM, Australian Cancer Study, Australian Ovarian Cancer Study Group. Talcum powder, chronic pelvic inflammation and NSAIDs in relation to risk of epithelial ovarian cancer. *Int J Cancer*, 2008; 122: 170-6. (PMID 17721999)

**BAV, HJO:** Song H, Ramus SJ, Tyrer J, Bolton KL, Gentry-Maharaj A, Wozniak E, Anton-Culver H, Chang-Claude J, Cramer DW, DiCioccio R, Dörk T, Goode EL, Goodman MT, Schildkraut JM, Sellers T, Baglietto L, Beckmann MW, Beesley J, Blaakaer J, Carney ME, Chanock S, Chen Z, Cunningham JM, Dicks E, Doherty JA, Dürst M, Ekici AB, Fenstermacher D, Fridley BL, Giles G, Gore ME, De Vivo I, Hillemanns P, Hogdall C, Hogdall E, Iversen ES, Jacobs IJ, Jakubowska A, Li D, Lissowska J, Lubiński J, Lurie G, McGuire V, McLaughlin J, Medrek K, Moorman PG, Moysich K, Narod S, Phelan C, Pye C, Risch H, Runnebaum IB, Severi G, Southey M, Stram DO, Thiel FC, Terry KL, Tsai YY, Tworoger SS, Van Den Berg DJ, Vierkant RA, Wang-Gohrke S, Webb PM, Wilkens LR, Wu AH, Yang H, Brewster W, Ziogas A; Australian Cancer (Ovarian) Study; Australian Ovarian Cancer Study Group; Ovarian Cancer Association Consortium, Houlston R, Tomlinson I, Whittemore AS, Rossing MA, Ponder BA, Pearce CL, Ness RB, Menon U, Kjaer SK, Gronwald J, Garcia-Closas M, Fasching PA, Easton DF, Chenevix-Trench G, Berchuck A, Pharoah PD, Gayther SA. A genome-wide association study identifies a new ovarian cancer susceptibility locus on 9p22.2. *Nat Genet.* 2009 Sep;41(9):996-1000. Epub 2009 Aug 2. (PMID 19648919)

**CON:** Risch HA, Bale AE, Beck PA, Zheng W. PGR +331A/G and increased risk of epithelial ovarian cancer. *Cancer Epidemiol Biomarkers Prev* 2006;15:1738-41. (PMID 16985038)

**DOV:** Bodelon C, Cushing-Haugen KL, Wicklund KG, Doherty JA, Rossing MA. Sun exposure and risk of epithelial ovarian cancer. *Cancer Causes Control*.2012 Dec;23(12):1985-94. Epub 2012 Oct 12. (PMID: 23065074)

**GER:** Royar J, Becher H, Chang-Claude J. Low-dose oral contraceptives: protective effect on ovarian cancer risk. *Int J Cancer.* 2001 Nov 20;95(6):370-4. (PMID 11668519)

**HAW:** Goodman MT, Lurie G, Thompson PJ, McDuffie KE, Carney ME. Association of two common single-nucleotide polymorphisms in the CYP19A1 locus and ovarian cancer risk. *Endocr Relat Cancer.* Dec2008; 15(4):1055-1066. (PMID 18667686)

**HOP:** Lo-Ciganic WH, Zgibor JC, Bunker CH, Moysich KB, Edwards RP, Ness RB. Aspirin, nonaspirin nonsteroidal anti-inflammatory drugs, or acetaminophen and risk of ovarian cancer. *Epidemiology.* 2012 Mar;23(2):311-9. doi:10.1097/EDE.0b013e3182456ad3. (PMID: 22252409)

**JPN:** Hamajima N, Matsuo K, Saito T, Hirose K, Inoue M, Takezaki T, Kuroishi T, Tajima K. Gene-environment Interactions and Polymorphism Studies of Cancer Risk in the Hospital-based Epidemiologic Research Program at Aichi Cancer Center II (HERPACC-II). *Asian Pac J Cancer Prev.* 2001, 2(2):99-107. (PMID 12718640)

**MAY:** Goode EL, Chenevix-Trench G, Hartmann LC, Fridley BL, Kalli KR, Vierkant RA, Larson MC, White KL, Keeney GL, Oberg TN, Cunningham JM, Beesley J, Johnatty SE, Chen X, Goodman KE, Armasu SM, Rider DN, Sicotte H, Schmidt MM, Elliott EA, Høgdall E, Kjaer SK, Fasching PA, Ekici AB, Lambrechts D, Despierre E, Høgdall C, Lundvall L, Karlan BY, Gross J, Brown R, Chien J, Duggan DJ, Tsai YY, Phelan CM, Kelemen LE, Peethambaram PP, Schildkraut JM, Shridhar V, Sutphen R, Couch FJ, Sellers TA; Ovarian Cancer Association Consortium. Assessment of hepatocyte growth factor in ovarian cancer mortality. *Cancer Epidemiol Biomarkers Prev.* 2011 Aug; 20(8):1638-48. (PMID 21724856)

**MAL:** Glud E, Kjaer SK, Thomasen BL, Hogdall C, Christensen L, Hogdall E, Bock JE, Blaakaer J. Hormone Therapy and the Impact of Estrogen Intake on the Risk of Ovarian Cancer. *Arch Intern Med* 2004; 164(29): 2253-2259. (PMID 15534163 )

**MAY:** Kelemen LE, Sellers TA, Schildkraut JM, Cunningham JM, Vierkant RA, Pankratz VS, Fredericksen ZS, Gadre MK, Rider DN, Liebow M, Goode EL. Genetic variation in the one-carbon transfer pathway and ovarian cancer risk. *Cancer Res.* 2008 Apr 1;68(7):2498-506. (PMID 18381459)

**NCO:** Schildkraut JM, Iversen ES, Wilson MA, Clyde MA, Moorman PG, Palmieri RT, Whitaker R, Bentley RC, Marks JR and Berchuck A. Association between DNA damage response and repair genes and risk of invasive serous ovarian cancer. *PLoS One.* 2010 Apr 8;5(4):e10061. (PMID 20386703)

**NEC:** Terry KL, De Vivo I, Titus-Ernstoff L, Shih MC, Cramer DW. Androgen receptor cytosine, adenine, guanine repeats, and haplotypes in relation to ovarian cancer risk. *Cancer Res.* 2005;65:5974-81.(PMID 15994977)

**NJO:** Bandera EV, Williams-King MG, Chandran U, Paddock L, Rodriguez-Rodriguez L, Lu S-E, Faulkner S, Pulick K, Olson SH. Phytoestrogen consumption from food and supplements and ovarian cancer risk. *BMC Women's Health* 2011 Sept 23;11:40 . (PMID 21943063)

**NTH :** Goode EL, Chenevix-Trench G, Song H, Ramus SJ, Notaridou M, Lawrenson K, Widschwendter M, Vierkant RA, Larson MC, Kjaer SK, Birrer MJ, Berchuck A, Schildkraut J, Tomlinson I, Kiemeny LA, Cook LS, Gronwald J, Garcia-Closas M, Gore ME, Campbell I, Whittemore AS, Sutphen R, Phelan C, Anton-Culver H, Pearce CL, Lambrechts D, Rossing MA, Chang-Claude J, Moysich KB, Goodman MT, Dörk T, Nevanlinna H, Ness RB, Rafnar T, Hogdall C, Hogdall E, Fridley BL, Cunningham JM, Sieh W, McGuire V, Godwin AK, Cramer DW, Hernandez D, Levine D, Lu K, Iversen ES, Palmieri RT, Houlston R, van Altena AM, Aben KK, Massuger LF, Brooks-Wilson A, Kelemen LE, Le ND, Jakubowska A, Lubinski J, Medrek K, Stafford A, Easton DF, Tyrer J, Bolton KL, Harrington P, Eccles D, Chen A, Molina AN, Davila BN, Arango H, Tsai YY, Chen Z, Risch HA, McLaughlin J, Narod SA, Ziogas A, Brewster W, Gentry-Maharaj A, Menon U, Wu AH, Stram DO, Pike

---

MC; Wellcome Trust Case-Control Consortium, Beesley J, Webb PM; Australian Cancer Study (Ovarian Cancer); Australian Ovarian Cancer Study Group; Ovarian Cancer Association Consortium (OCAC), Chen X, Ekici AB, Thiel FC, Beckmann MW, Yang H, Wentzensen N, Lissowska J, Fasching PA, Despierre E, Amant F, Vergote I, Doherty J, Hein R, Wang-Gohrke S, Lurie G, Carney ME, Thompson PJ, Runnebaum I, Hillemanns P, Dürst M, Antonenkova N, Bogdanova N, Leminen A, Butzow R, Heikkinen T, Stefansson K, Sulem P, Besenbacher S, Sellers TA, Gayther SA, Pharoah PD; Ovarian Cancer Association Consortium (OCAC). A genome-wide association study identifies susceptibility loci for ovarian cancer at 2q31 and 8q24. *Nat Genet.* 2010 Oct;42(10):874-9. Epub 2010 Sep 19. (PMID 20852632)

**TBO:** Pal T, Permuth-Wey J, Betts JA et al. (2005) BRCA1 and BRCA2 mutations account for a large proportion of ovarian carcinoma cases. *Cancer* 104:2807-2816 (PMID 16284991); Pal T, Permuth-Wey J, Kapoor R, Cantor A, Sutphen R. (2007) Improved survival in BRCA2 carriers with ovarian cancer. *Familial Cancer* 6:113-119 (PMID 17160431)

**UCI:** Ziogas A, Gildea M, Cohen P, Bringman D, Taylor TH, Seminara D, Barker D, Casey G, Haile R, Liao SY, Thomas D, Noble B, Kurosaki T, Anton-Culver H. Cancer risk estimates for family members of a population-based family registry for breast and ovarian cancer. *Cancer Epidemiol Biomarkers Prev.* 2000 Jan;9(1):103-11. (PMID 10667470)

**UKO:** Balogun N, Gentry-Maharaj A, Wozniak EL, Lim A, Ryan A, Ramus SJ, Ford J, Burnell M, Widschwendter M, Gessler SF, Gayther SA, Jacobs IJ, Menon U. Recruitment of newly diagnosed ovarian cancer patients proved challenging in a multicentre biobanking study. *J Clin Epidemiol.* 2011 May;64(5):525-30. doi:10.1016/j.jclinepi.2010.07.008. Epub 2010 Nov 13. PubMed PMID: 21074968.

**USC:** Pike MC, Pearce CL, Peters R, Cozen W, Wan P, Wu AH. Hormonal factors and the risk of invasive ovarian cancer: a population-based case-control study.

*Infertility, Fertility Drugs, and Ovarian Cancer: A Pooled Analysis of Case-Control Studies.* Roberta B. Ness, Daniel W. Cramer, Marc T. Goodman, Susanne Krüger Kjaer, Kathy Mallin, Berit Jul Mosgaard, David M. Purdie, Harvey A. Risch, Ronald Vergona, and Anna H. Wu. *Am J Epidemiol.* 2002 Feb 1;155(3):217-24. (PMID 11821246)

**WOC:** A novel germline PALB2 deletion in Polish breast and ovarian cancer patients. Dansonka-Mieszkowska A, Kluska A, Moes J, Dabrowska M, Nowakowska D, Niwinska A, Derlatka P, Cendrowski K, Kupryjanczyk J. *BMC Med Genet.* 2010 Feb 2;11:20. (PMID 20122277)

<sup>2</sup> Studies that provided information on progression-free survival

Abbreviations used: MRR-medical records review, Q-question.
